# Supplementary material for: The Arabidopsis Mitochondrial Glutaredoxin GRXS15 Provides [2Fe-2S] Clusters for ISCA-Mediated [4Fe-4S] Cluster Maturation
Source: PubMed Central journal article supplement (PMC7730481; doi:10.3390/ijms21239237), 2020-12-03
Supplement: ijms-21-09237-s001.pdf [file ijms-21-09237-s001.pdf]

Supporting information for the manuscript

The Arabidopsis mitochondrial glutaredoxin GRXS15 provides [2Fe-2S] clusters for ISCA-mediated [4Fe-4S] cluster maturation

**Tamanna Azam<sup>1,†</sup>, Jonathan Przybyla-Toscano<sup>2,†</sup>, Florence Vignols<sup>3</sup>, Jérémy Couturier<sup>2</sup>, Nicolas Rouhier<sup>2</sup>, and Michael K. Johnson<sup>1,\*</sup>**

**Figure S1. Amino acid sequence alignment of the mature region of mitochondrial monothiol glutaredoxins from *Arabidopsis thaliana*, *At* GRXS15 ; *Saccharomyces cerevisiae*, *Sc* Grx5 ; and human, *Hs* GLRX5.**

**Figure S2. Amino acid sequence alignment of ATCs.**

**Figure S3. BiFC assays between Arabidopsis GRXS15 and ISCA proteins in Arabidopsis leaf protoplasts (complement).**

**Figure S4. Control studies supporting unidirectional [2Fe-2S] cluster transfer from GRXS15 to mFDX1.**

**Figure S5. Oligomeric state of as-purified *At* ISCA1a/2 heterocomplex assessed by size exclusion chromatography and gel electrophoresis.**

**Table S1. Primers used in this study.**

|          |                                   |                                                    |                                       |
|----------|-----------------------------------|----------------------------------------------------|---------------------------------------|
| AtGRXS15 | SSTVPSDSSTHDDFKPTQKVPPDSTDSLKD    | IVENDVKDNPVMIYMKGVPE                               | SPQCGFSSLA                            |
| HsGRX5   | -----GAGGGG                       | SAEQLDALVKKDKVVVFLKGTPEQPQCGFSNAV                  |                                       |
| ScGRX5   | -----LSTE                         | IRKAIEDAIESAPVVLFMKGTPEFPKCGFSRAT                  |                                       |
|          |                                   |                                                    | *      **   *   *   *   *   *   *   * |
| AtGRXS15 | VRVLQQYNV-P--ISSRNILEDQELKNAVKSF  | SHWPTFPQIFIKGEFIGGSDIILNMHKE                       |                                       |
| HsGRX5   | VQILRLHGVRD--YAAYNVLDDPELRQGIKDYS | SNWPTIPQVYLNGEFVGGCDILLQMHQN                       |                                       |
| ScGRX5   | IGLLGNQGVDP                       | PAKFAAYNVLEDPELREGIKEFSEWPTIPQLYVNKEFIGGCDVITSMARS |                                       |
|          | *      *                          | *   *   *   *   *                                  | *   *   *   *   *   *   *   *   *   * |
| AtGRXS15 | GELEQKLKD-----VSGNQD              |                                                    |                                       |
| HsGRX5   | GDLVEELKKLGIHSALLDEKKDQDSK        |                                                    |                                       |
| ScGRX5   | GELADLLEE--AQALVPEEEEEETKDR       |                                                    |                                       |
|          | *   *   *                         |                                                    |                                       |

**Figure S1. Amino acid sequence alignment of the mature region of mitochondrial monothiol glutaredoxins from *Arabidopsis thaliana*, At GRXS15 ; *Saccharomyces cerevisiae*, Sc Grx5 ; and human, Hs GLRX5.** The sequence alignment was performed with MUSCLE. Conserved amino acids are indicated with a star and the semi-conserved cysteine residue present in the C-terminal region of some monothiol GRXs by an arrow. The unusual N-terminal extension found in plant GRXS15 sequences is boxed,

```

ScIsa2                MQAKLLFTRLNFRRPSTTLRQFPLTCFLFHSK--AFYSDLVTK
AtISCA2                MSRSLVKRVAPYLAGRIENHRLLNFFSSASAIK
HsISCA2                MAAAWGSSLTAATQRAVTPWPRGRLL-----TASLGP
HsISCA1                MVAAGGGARTEGAVRRSLWRQCARRVHGEKLRPTFGPRHRGAGTAKMSA
ScIsa1                MINTGRSRNSVLLAHRFLSTGGFWRGGTNGTMSRTINNVNPFKLFIPKTVPAAADSVSP
AtISCA1a                MKASQILAAAAARVGP
AtISCA1b

ScIsa2                EPLITPKRIINK-----
AtISCA2                EASSSSSSSQPES-----
HsISCA2                QARREASSSSPE-----
HsISCA1                SLVRATVRAVSK-----
ScIsa1                DSQRPGKKPFKFI VSNQSKSSKASKSPKWSSYAFPSRETIKSHEEAIKKQNKAI DEQIAA
AtISCA1a                A-----
AtISCA1b

ScIsa2                -----TPGLNLSISERASNRLAEIYRNSKEN--LRISVESGGCH
AtISCA2                -----SSNDVVHLSDNCI RRMKELQSSEPEKMLRLGVETGGCS
HsISCA2                -----AGEGQIRLTDSCVQRLL EITEGSE---FLRLQVEGGGCS
HsISCA1                -----RKLQPTRAALTLT PSAVNKIKQLLKDKPEHVGKVGVRTRGCN
ScIsa1                AVSKNDCSCTEPPKRRKRLRPRKALITLSPKAIKHLRALLA-QPEPKLIRVSARNRGCS
AtISCA1a                -----LRKQVLTLTDEAASRVHLLQQRQKP-FLRLGVKARGCN
AtISCA1b                MRKQVLALSDTAAARIRQLLQHQQKP-FLRLAVEAKGCN
                                                                **

ScIsa2                GFQYNLTLEPATKPDIKNDVKDKFE SDDLDDDDSKDIIYVLPEDKGRV IIDSKSLN I LNN
AtISCA2                GFQYKF-----ELDNRTNPDDR-----VFEKNGVKLVVDNVS YDLVKG
HsISCA2                GFQYKF-----SLDTVINPDDR-----VFEQGGARVVVDSDSLAFVKG
HsISCA1                GLSYTL-----EYTKTKGDSDE-----EVIQDGV RVFIEKKAQLTLLG
ScIsa1                GLTYDL-----QYITEPGKFDE-----VVEQDGVKIV I DSKALFSIIG
AtISCA1a                GLSYTL-----NYADEKGKGFDE-----LVEEKGV RILVEPKALMHVIG
AtISCA1b                GLSYVL-----NYAQEKGKGFDE-----VVEEKGVKILVDPKAVMHVIG
*   *                                     *

ScIsa2                TTLTYTNELIGSSF-KI INGS LKSSCGCGSSFDIEN
AtISCA2                ATIDYEEELIRAAFVAVNPSAVGGC SCKSSFMVKL
HsISCA2                AQVDFSQELIRSSFQVLNNPQAQQGC SCGSSFSIKL
HsISCA1                TEMDYVEDKLSSEF-VFNNPNIKGTCGCGESFNI
ScIsa1                SEMDWIDDKLRSEF-VFKNPN SKGTCGCGESFMV
AtISCA1a                TKMDFVDDKLRSEF-VF INPNSQGC GCGESFMTTSTSSAKQSAS
AtISCA1b                TEMDFVDDKLRSEF-VFVNP NATK-CGCGESFTTT
*   *   *   *   *

```

**Figure S2. Amino acid sequence alignment of ATCs.** Amino acid sequence alignment of the A-type carrier (ATC) proteins from *Arabidopsis thaliana* (*At*); *Saccharomyces cerevisiae* (*Sc*); and human (*Hs*). The sequence alignment was performed with MUSCLE and highlights the insertions present in yeast *Isa1* and *Isa2*. Conserved amino acids are indicated with an asterisk.

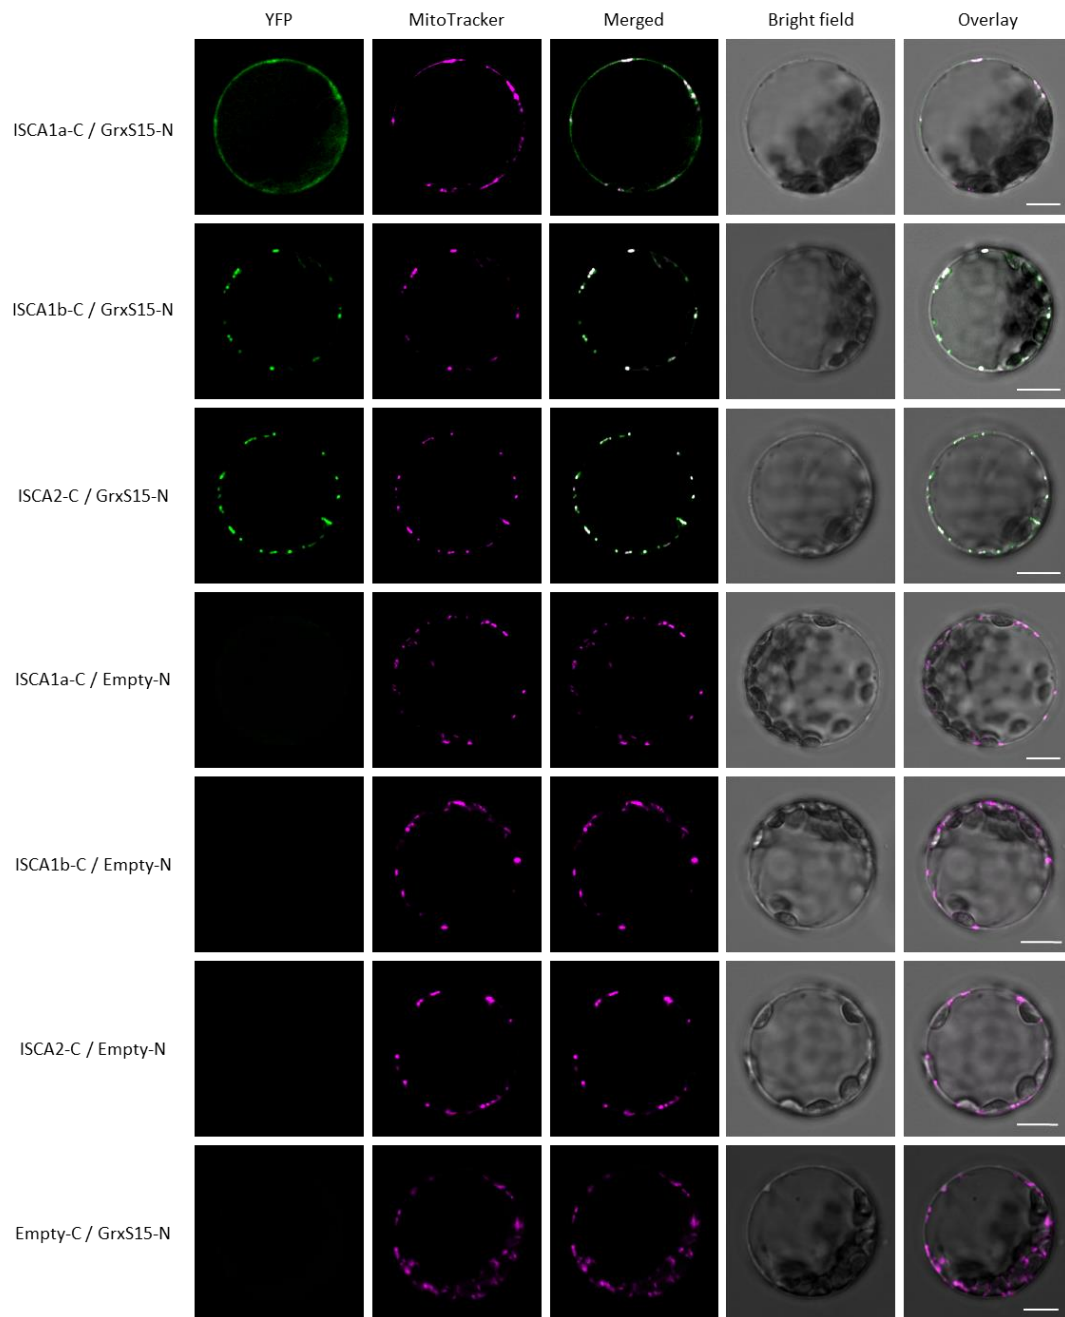

**Figure S3. BiFC assays between Arabidopsis GRXS15 and ISCA proteins in Arabidopsis leaf protoplasts (complement).** *Arabidopsis* protoplasts obtained from 4-week-old plantlets were transfected with combinations of two vectors expressing GRXS15 fused to the N-terminal region of the YFP protein (GRXS15-N in panels) and ISCA-C cloned upstream of the C-terminal region of YFP (ISCA-C in panels). The YFP fluorescence was recorded 24h post-transfection by confocal microscopy. All confocal images shown here were captured at selected confocal planes without Z-stack intensity projection. Negative controls verifying that none of the proteins expressed alone can restore YFP fluorescence are shown. BiFC results obtained using opposite protein fusion conformations (GRXS15-C co-expressed with ISCA-N) showed less clear-cut results as a strong fluorescence in the cytosol suggested the formation of aggregates was obtained for some combinations. YFP, yellow fluorescent protein. Bars = 10  $\mu$ m.

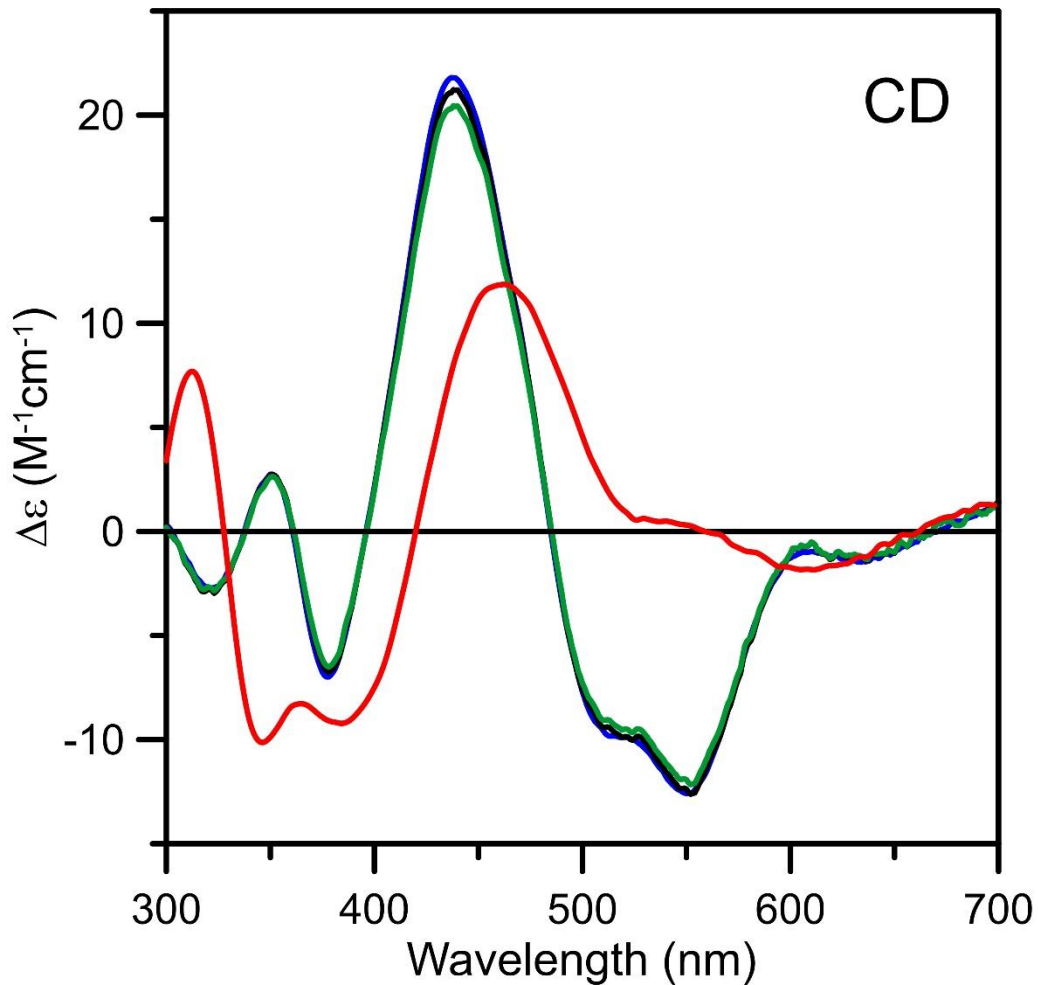

**Figure S4. Control studies supporting unidirectional [2Fe-2S] cluster transfer from GRXS15 to mFdx1.** Attempted [2Fe-2S] cluster transfer from *At* holo-mFdx1 to *At* apo-GRXS15 monitored by CD spectroscopy as a function of time. CD spectra of the reaction mixture that was initially 40  $\mu\text{M}$  in holo-mFdx1 and 80  $\mu\text{M}$  in apo-GRXS15 monomers. The blue line corresponds to holo-mFdx1 recorded before addition of apo-GRXS15. The black and green lines correspond to the CD spectra recorded at 10 and 40 min, respectively, after the addition of apo-GRXS15. The red line corresponds to the CD spectrum expected for holo-GRXS15. The lack of a significant change in the CD spectrum after 40 min indicates no significant cluster transfer. The reaction conditions were the same as those used for the successful reverse cluster transfer shown in Fig. 4B and 4C.

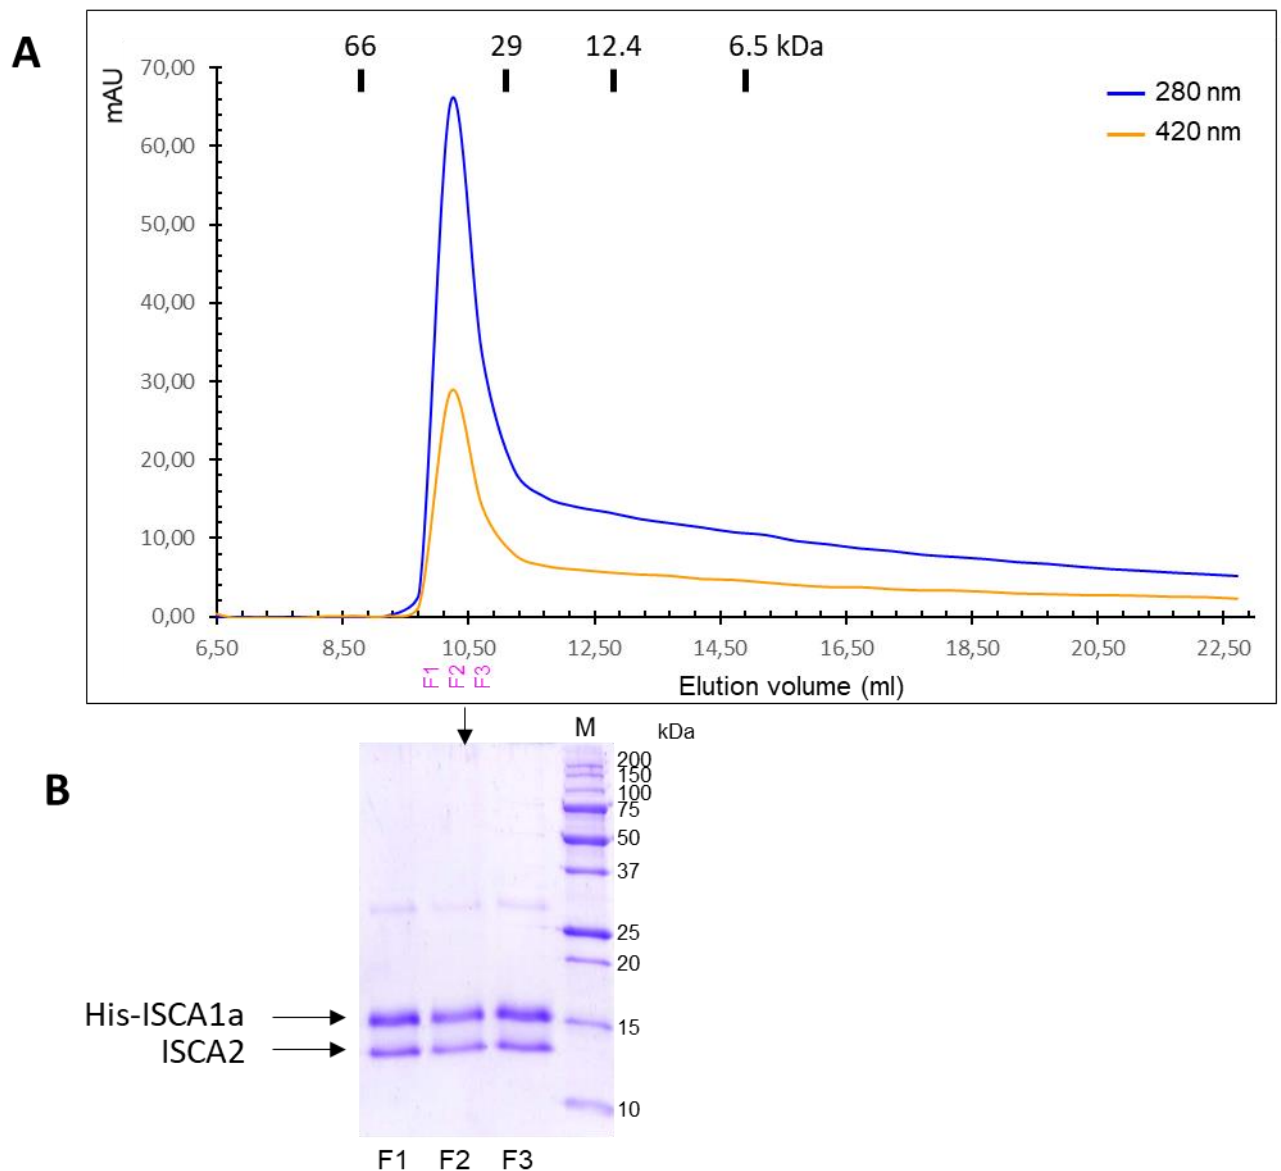

**Figure S5. Oligomeric state of as-purified *At* ISCA1a/2 heterocomplex assessed by size exclusion chromatography and gel electrophoresis.**

A. Representative elution profile of IMAC-purified ISCA1a/2 sample (100  $\mu$ g) on analytical size-exclusion chromatography (Superdex<sup>TM</sup> 75 10/300 column) equilibrated with a buffer containing 30 mM Tris-HCl buffer pH 8.0 and 100 mM NaCl and connected to an ÄKTA-Purifier<sup>TM</sup> (GE Healthcare) at a temperature of 10°C. Absorbances at 280 and 420 nm were recorded. The apparent molecular mass has been estimated from the calibration curve established with molecular mass standards ranging from 6.5 to 66 kDa (Sigma). The molecular mass of each protein and their elution volume are as follows: aprotinin (bovine lung) - 6,500 Da - 14.99 ml; cytochrome C (horse heart) - 12,400 Da - 12.86 ml; carbonic anhydrase (bovine erythrocytes) - 29,000 Da - 11.12 ml, albumin (bovine serum) - 66,000 Da - 9.06 ml. B. Gel electrophoresis of the fractions corresponding to the sole peak of the elution profile. Proteins were separated by 15% SDS-PAGE and stained with Coomassie Brilliant blue. Molecular mass standards are indicated. Considering the respective theoretical molecular masses of 15.7 and 13.2 kDa for *At* ISCA1a and *At* ISCA2, we deduced that the 34 kDa apparent volume indicated that *At* ISCA1a/2 is a heterodimer.

| AGI number | Gene names | Plasmids                           | Primer names     | Sequences                                               | N-terminal sequences |
|------------|------------|------------------------------------|------------------|---------------------------------------------------------|----------------------|
| At3g15660  | GRXS15     | pET3d, pGADT7, pGBKT7              | AtGRXS15 for     | 5' <b>CCCCC</b> <b>CATGG</b> CTAGATTTTCCTCAACAGTGCCA 3' | MARFSSTVP            |
|            |            |                                    | AtGRXS15 rev     | 5' <b>CCCCGGATCC</b> TCAATCTTGGTTTCCGGA 3'              |                      |
|            |            | pUC-SPYNE/SPYCE                    | AtGRXS15 for2    | 5' <b>CCCCGGATCC</b> ATGGCGGCTTCTTTATCG 3'              | MAASLS               |
|            |            |                                    | AtGRXS15 rev2    | 5' <b>CCCCCTCGAG</b> ATCTTGGTTTCCGGAGAC 3'              |                      |
| At2g16710  | ISCA1a     | pET28a, pCDFDUET<br>pGADT7, pGBKT7 | AtISCA1a for     | 5' <b>CCCCCCC</b> <b>CATATG</b> AAGCAAGTATTAAC 3'       | MKQVLT               |
|            |            |                                    | AtISCA1a rev     | 5' <b>CCCCGGATCC</b> TAACTAGCACTCTGCTT 3'               |                      |
|            |            | pUC-SPYNE/SPYCE                    | AtISCA1a for2    | 5' <b>CCCC</b> <b>TCTAGA</b> ATGAAAGCTTCTCAAATT3'       | MKASQI               |
|            |            |                                    | AtISCA1a rev2    | 5' <b>CCCCCTCGAG</b> ACTAGCACTCTGCTTAGC3'               |                      |
| At2g36260  | ISCA1b     | pET28a, pGADT7, pGBKT7             | AtISCA1b for     | 5' <b>CCCCCCC</b> <b>CATATG</b> CGAAAGCAAGTATTAGCA 3'   | MRKQVLA              |
|            |            |                                    | AtISCA1b rev     | 5' <b>CCCCGGATCC</b> TCATGTTGTCGTGAATGACTC 3'           |                      |
|            |            | pUC-SPYNE/SPYCE                    | AtISCA1bfor2     | 5' <b>CCCC</b> <b>TCTAGA</b> ATGAGAAAGCAAGTATTA 3'      | MRKQVL               |
|            |            |                                    | AtISCA1b rev2    | 5' <b>CCCCCTCGAG</b> TGTTGTCGTGAATGACTC 3'              |                      |
|            |            | mutagenesis                        | AtISCA1bV66V for | 5' <b>GGTGTAAAGATCCTTGTGTCGATCCAAAGGCGGTG</b> 3'        |                      |
|            |            |                                    | AtISCA1bV66V rev | 5' <b>CACCGCCTTTGGATCGACAAGGATCTTTACACC</b> 3'          |                      |
| At5g03905  | ISCA2      | pET12a, pGADT7, pGBKT7             | AtISCA2 for      | 5' <b>CCCCCCC</b> <b>CATATG</b> TCCCAACCTGAATCG 3'      | MSQPES               |
|            |            |                                    | AtISCA2 rev      | 5' <b>CCCCGGATCC</b> TCAGAGTTTCACCATGAA 3'              |                      |
|            |            | pCDFDUET                           | AtISCA2 rev2     | 5' <b>CCCCCTCGAG</b> GAGTTTCACCATGAAGGA 3'              |                      |
|            |            | pUC-SPYNE/SPYCE                    | AtISCA2 for2     | 5' <b>CCCC</b> <b>TCTAGA</b> ATGTCAAGATCTCTGGTG 3'      | MSRSLV               |
|            |            |                                    | AtISCA2 rev3     | 5' <b>CCCCCTCGAG</b> GAGTTTCACCATGAAGGA 3'              |                      |

**Table S1. Primers used in this study.** Restriction sites required for cloning are in red. For nuclear-encoded plastidial proteins, the sequences coding for the putative targeting sequences have been removed for the cloning in pET and pGADT7/pGBKT7 vectors. Consequently, a methionine codon has been introduced in corresponding forward (for) primers. Owing to the use of NcoI restriction site for AtGRXS15 cloning, an alanine has been added after the methionine to respect the open reading frames. For ISCA1b, an internal BamHI restriction site was mutated by site-directed mutagenesis introducing a silent substitution in the AtISCA1bV66V forward and reverse primers (in bold). Full-length sequences have been cloned in pUC-SPYCE/SPYNE vector.
